# Supplementary material for: In Vivo Evaluation of Thiamine Hydrochloride with Gastro-Retentive Drug Delivery in Healthy Human Volunteers Using Gamma Scintigraphy
Source: MDPI journal article supplement (doi:10.3390/pharmaceutics15020691), 2023-02-17
Supplement: s1 [file s1]

Table S2: Extraction recovery, within-day and between-day precision and accuracy values (n=6) for thiamine

| Concentration<br>(ng/ml) | Extraction Recovery <sup>1</sup> |             | Within-Day                    |                              | Between-Day      |                 |
|--------------------------|----------------------------------|-------------|-------------------------------|------------------------------|------------------|-----------------|
|                          | Mean<br>(%)                      | C.V.<br>(%) | Precision <sup>2</sup><br>(%) | Accuracy <sup>3</sup><br>(%) | Precision<br>(%) | Accuracy<br>(%) |
| 0.625                    | 78.1                             | 10.7        | 12.8                          | 94.3                         | 8.2              | 105.5           |
| 1.25                     | 70.9                             | 12.1        | 8.5                           | 107.8                        | 8.8              | 94.8            |
| 10.0                     | 70.8                             | 8.3         | 12.2                          | 98.4                         | 5.6              | 102.5           |
| 80.0                     | 63.8                             | 10.5        | 8.1                           | 91.7                         | 7.2              | 96.9            |

<sup>1</sup> Extraction recovery was calculated by comparing the response of the thiamine obtained after extraction with that of the corresponding concentration of thiamine working solution in 1% acetic acid (without extraction). Extraction recovery for atenolol (internal standard) was approximately 50%.

<sup>2</sup> Precision was denoted using coefficient of variation.

<sup>3</sup> Accuracy was expressed as percentage of the true value.
