# Supplementary material for: In Vivo Evaluation of Thiamine Hydrochloride with Gastro-Retentive Drug Delivery in Healthy Human Volunteers Using Gamma Scintigraphy
Source: MDPI journal article supplement (doi:10.3390/pharmaceutics15020691), 2023-02-17
Supplement: s1 [file s1]

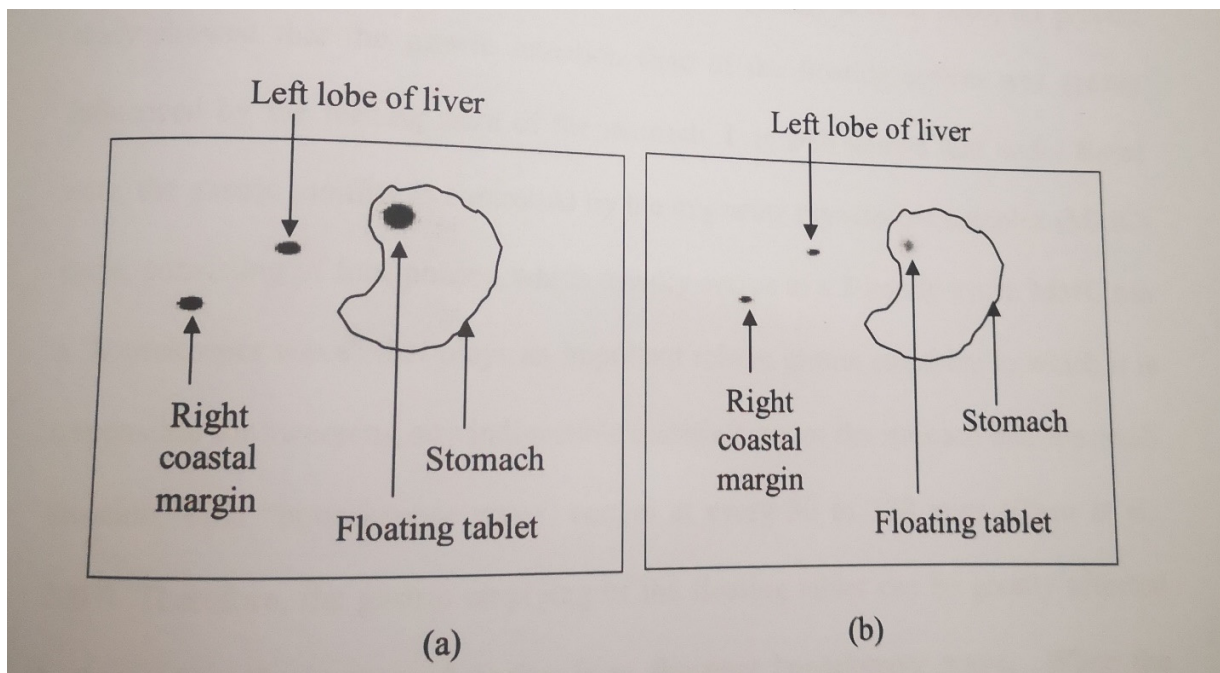

Figure S2: Gamma scintigraphy images of floating tablet for volunteer 8 in fed state at (a) 60 minutes prior to gastric emptying of the tablet and (b) 600 minutes prior to gastric emptying of the tablet.
